# 1 **High SARS-CoV-2 attack rates following exposure during five singing** 2 **events in the Netherlands, September-October 2020**

## 3 **Authors and affiliations**

4 Anita A. Shah (1, 2), Florian Dusseldorp (3), Irene K. Veldhuijzen (1), Margreet J.M. te Wierik (1), Alvin  
5 Bartels (1), Jack Schijven (4, 5), Lucie C. Vermeulen (1), Mirjam J. Knol (1)

6 1. Center for Infectious Disease Control, National Institute for Public Health and Environment  
7 (RIVM), Bilthoven, The Netherlands

8 2. European Programme for Intervention Epidemiology Training (EPIET), European Centre for  
9 Disease Prevention and Control (ECDC), Stockholm, Sweden

10 3. Department of Infectious Disease Control, Public Health Service Hollands Midden (GGD),  
11 Hollands Midden, The Netherlands

12 4. Department of Statistics, Informatics and Modelling, National Institute for Public Health and  
13 Environment (RIVM), Bilthoven, The Netherlands

14 5. Chair Quantitative Microbial Water Safety, Environmental Hydrogeology Group Department of  
15 Earth Sciences, Utrecht University, The Netherlands

16 **Keywords:** COVID-19; choir; droplet transmission; airborne transmission; airflow

## 17 **Summary**

18 This outbreak investigation among five singing events with high SARS-CoV-2 attack rates (53-74%)  
19 suggested that airflow expelling respiratory droplets >1.5m possibly influenced transmission and it is  
20 possible that singing itself increased SARS-CoV-2 transmission risk through airborne transmission.

21

22

23

24 **NOTE:** This preprint reports new research that has not been certified by peer review and should not be used to guide clinical practice.

## 25 **Abstract**

### 26 **Background**

27 Previous reports suggest SARS-CoV-2 transmission risk increases during singing events. From  
28 September-October 2020, several clusters of COVID-19 cases among singing events were reported  
29 across the Netherlands. Our aim was to investigate whether singing increased SARS-CoV-2  
30 transmission risk during these events.

### 31 **Methods**

32 Data from 5 events were retrospectively collected from spokespersons and singing group members  
33 via questionnaires. Information was consolidated with the National Notifiable Diseases Surveillance  
34 System. Specimens were requested for sequencing for point source and cluster assessment. We  
35 described outbreaks in terms of person, place and time and depicted potential SARS-CoV-2  
36 transmission routes. A previously published model (AirCoV2) was used to estimate mean illness risk  
37 of 1 person through airborne transmission under various scenarios.

### 38 **Results**

39 Events included 9-21 persons (mean: 16), aged 20-89 years (median: 62). Response rates ranged 58-  
40 100%. Attack rates were 53-74%. Limited sequencing data was obtained from 2 events. Events lasted  
41 60-150 minutes (singing: 20-120). Rooms ranged 320-3000m<sup>3</sup>. SARS-CoV-2 transmission likely  
42 occurred during all events; with a possible index case identified in 4 events. AirCoV2 showed 86%  
43 (54-100%) mean illness risk for 120 minutes of singing, smaller room (300m<sup>3</sup>), 1 air exchange/hour  
44 (ACH), and supershedder presence.

### 45 **Conclusions**

46 Droplet transmission and indirect contact probably caused some cases, but unlikely explain the high  
47 attack rates. AirCoV2 indicated that airborne transmission due to singing is possible in case of  
48 supershedder presence. Airflow expelling respiratory droplets >1.5m possibly influenced  
49 transmission. It is possible that singing itself increased SARS-CoV-2 transmission risk through airborne  
50 transmission.

## 51 **Introduction**

52 Several outbreaks with high attack rates among singing groups, including several in the Netherlands,  
53 were described in literature and media from March until September 2020 [1-6] suggesting a possible  
54 elevated risk of severe acute respiratory syndrome coronavirus 2 (SARS-CoV-2) transmission for  
55 singing. It was unclear whether the outbreaks were the result of frequent and prolonged social  
56 contact (<1.5m) before, during, or after the singing event, or whether singing itself was a risk [7].  
57 Singing groups stopped practicing from March 2020 in the Netherlands due to widespread SARS-CoV-  
58 2 transmission alongside other lockdown measures. Due to decreasing incidence of coronavirus  
59 disease 2019 (COVID-19) in the summer and easing of restrictions, group singing was allowed again in  
60 the Netherlands from July 2020. Specific recommendations for group singing included singing in  
61 zigzag formation and following ventilation advice guidelines, including using a room with mandatory  
62 ventilation rates for gatherings and regular venting when people were not in the room (e.g. during  
63 breaks) [7]. Face mask use in indoor places was not obligatory during this period. In the Netherlands,  
64 approximately one million singers participate in 24,000 choirs [8] and an estimated 70% of choirs  
65 resumed practicing from September 2020. From September through October 2020, there was a rapid  
66 increase in weekly COVID-19 incidence in the Netherlands from 31.4 to 391 per 100,000 [9].  
67 From September through October 2020, we investigated clusters of COVID-19 cases among five  
68 singing events that were reported to the National Institute for Public Health and Environment (RIVM)  
69 in the Netherlands. Four reported clusters were related to choir rehearsals and one to a singing  
70 ensemble during a church service. An investigation was carried out to establish whether singing  
71 increased SARS-CoV-2 transmission risk during these events. Here, we describe the outbreaks in terms  
72 of person, place and time and depict potential routes of SARS-CoV-2 transmission for each event.

## 73 **Methods**

### 74 **Epidemiological investigations**

75 Data on the five singing events were retrospectively first collected from a singing group  
76 spokesperson (organiser/singing group member) by phone or email and then an online questionnaire  
77 was sent to all singing group members. Questionnaire data was consolidated with the National  
78 Notifiable Diseases Surveillance System data, in order to deduce symptom onset date and positivity  
79 status. Formation diagrams were provided illustrating singing group member positions for each  
80 event. Diagrams were simplified and information aggregated to protect data confidentiality.

### 81 **Laboratory detection**

82 During the investigation period, the testing policy in the Netherlands was that only persons  
83 experiencing COVID-19-like symptoms could be tested free of charge using reverse transcription  
84 polymerase chain reaction (RT-PCR) tests. However, four asymptomatic persons were also tested on  
85 their own accord. We followed up on laboratory specimens for all confirmed cases for whole SARS-  
86 CoV-2 genome sequencing for point source and cluster assessment.

### 87 **Definitions**

88 An **outbreak confirmed case** was a person who was a singing group member (singer, conductor or  
89 musician) with a respiratory sample testing RT-PCR positive for SARS-CoV-2.

90 An **outbreak probable case** was a person who was a singing group member (singer, conductor or  
91 musician) and developed at least one of the following symptoms: cough, fever, sore throat, runny  
92 nose, increased or sudden loss of taste, loss of smell, fatigue, and shortness of breath, within 14 days  
93 following the singing event.

94 In one event, a preacher was considered a member of the singing group due to being in close  
95 proximity of singing group members.

96 **Droplet transmission** is infection spread through exposure to virus-containing respiratory droplets  
97 (i.e., larger and smaller droplets and particles) exhaled by an infectious person [10]. Transmission is  
98 most likely to occur when someone is close to the infectious person, generally within 1.5m distance

99 (e.g. contact with respiratory droplets after a cough). Respiratory droplets can be expelled further  
100 than 1.5m because of air currents or forceful ejections (e.g. violent sneeze) [11, 12].

101 **Indirect contact transmission** is infection after contact with an article or surface that has become  
102 contaminated [10].

103 **Airborne transmission** is infection spread through exposure to those virus-containing respiratory  
104 droplets comprised of smaller droplets and particles that can remain suspended in the air and,  
105 therefore be transported over longer distances (several metres) and time (typically hours) [10].

## 106 **Aerosol transmission model**

107 We used model AirCoV2 (version 1.5) described by Schijven et al. [13] to assess under which  
108 circumstances aerosols production by singing could have led to attack rates observed in the five  
109 singing events. The developed scenarios are based on event circumstances, although insufficient  
110 information was available to exactly simulate the circumstances. The model assumes an even  
111 distribution of aerosols containing virus particles across the space, and relatively high estimates of  
112 virus infectivity [13]. The model was applied for 20 scenarios encompassing a small and large room  
113 (300 vs 3000m<sup>3</sup>), exposure times of 30, 60 and 120 minutes, no ventilation, one or six air exchanges  
114 per hour (ACH). The model also includes concentration of 10<sup>7</sup> or 10<sup>10</sup> virus RNA copies per mL mucus  
115 (where 10<sup>10</sup> represents supershedder presence) [13, 14].

## 116 **Results**

### 117 **Singing event descriptions**

118 We report on five singing events across the Netherlands with minimum attack rates (including  
119 confirmed and probable cases) from 53–74% (Table 1). Online questionnaire response rates were  
120 58–100%. Events included 9–21 persons, aged 20–89 years (Table 1). In all events, transmission likely  
121 occurred during the event itself as this was the only common place and time that all affected singing  
122 group members were together. Cases were widely dispersed throughout the room in all events. From

123 event room size descriptions, all events except event 2, had adequate space for members to keep  
124 1.5m distance from each other (Table 1). In all events, except event 3, members stated that they kept  
125 1.5m distance from each other (Table 2). In events 1, 3, and 4, members reported feeling an air draft,  
126 however specific airflow information is not known (Table 2). Ventilation and other mechanisms used  
127 in each event is specified in Table 1.

### 128 **Singing event 1**

129 In singing event 1, 14 confirmed cases were identified out of 19 singing group members. Twelve of 14  
130 confirmed cases developed symptoms within 11 days of the event (Figure 1). One confirmed case  
131 was hospitalised. A single index case could not be clearly identified as seven persons had their  
132 symptom onset three days following the event (Figure 1). Three pairs travelled to and from the event  
133 together by car. In one pair, one person may have infected the other outside of the event as there  
134 were eight days between their symptom onset and they lived together. In the other two pairs, only  
135 one person in each pair tested positive. During the break, movement was limited as members  
136 remained in place and staff served coffee. Additional information was not available for staff. Event  
137 room doors were kept open and thus, touching of door handles was limited.

### 138 **Singing event 2**

139 In singing event 2, 13 confirmed cases were identified out of 21 singing group members. Eleven of 13  
140 confirmed cases developed symptoms within 7 days of the event (Figure 1). One probable case was  
141 also reported with symptom onset 4 days following the event. Two possible index cases with  
142 symptom onset two days following the event were identified (Figure 1). Six members travelled  
143 together by bicycle, and two pairs by car. Of the six who travelled by bicycle, two were confirmed  
144 cases. Among the two pairs who travelled by car; one pair included two confirmed cases and the  
145 other pair included one confirmed case. Members used individual sheet music and available toilets  
146 were spacious. Touchable shared surfaces were limited.

### 147 **Singing event 3**

148 In singing event 3, eight confirmed cases were identified out of 15 singing group members. Six of  
149 eight confirmed cases experienced symptoms within 7 days of the event (Figure 1). A possible index  
150 case was identified with symptom onset on the day after the event (Figure 1). This case also  
151 mentioned contact with a positive case, however, date was not specified. An additional person  
152 reported contact with a positive case in the 14 days prior to event however, this person's symptom  
153 onset was seven days following the event, therefore they are unlikely to be an index case (Table 2).  
154 Two pairs travelled together by car, and both tested positive in one pair, whereas the other pair  
155 included one person who tested negative and one person who was not tested. Common surfaces  
156 were limited with spacious separate toilets by gender.

#### 157 **Singing event 4**

158 In singing event 4, seven confirmed cases were identified out of 14 singing group members. All  
159 developed symptoms within six days of the event (Figure 1). One probable case was also reported  
160 with symptom onset 1 day following the event. A possible index case was identified who had  
161 symptom onset on the day of event (Figure 1). Six singing group members travelled together; two  
162 pairs by bicycle (all tested positive) and one pair by car (one tested positive, and the other was not  
163 tested, nor had symptoms). During the break, a coffee machine was used which required pushing a  
164 button. Three to four members assisted stacking chairs. Available sequencing revealed two identical  
165 strains in two persons positioned on opposite sides of the room (Table 1).

#### 166 **Singing event 5**

167 In singing event 5, six confirmed cases were identified out of 9 singing group members. All developed  
168 symptoms within eight days of the event (Figure 1). A possible index case was identified with  
169 symptom onset on the day after the event (Figure 1). This case was likely to have had contact with  
170 confirmed cases during work in the week prior to event. No common objects were reported to have  
171 been touched and individual microphones were used throughout the event. Sequencing revealed  
172 four out of five identical strains in persons positioned near each other. Screens were placed in front  
173 of singing group members and between church service attendees. It is not known how screen use

174 influenced transmission. Data was available for 58% of church service attendees (morning and  
175 afternoon). A maximum of 30 attendees were allowed at each service and singing group members  
176 were only present in the afternoon. Only one positive case was known among the attendees with  
177 possible exposure at the afternoon service. It is unclear whether this case is linked to confirmed  
178 cases among the singing group members as sequencing was not done.

### 179 **Aerosol transmission model**

180 The AirCoV2 model showed that the mean risk of illness of one person was 86% (54-100%) in a  
181 smaller room (300m<sup>3</sup>), 120 minutes of exposure time, one ACH, and with the presence of a  
182 supershedder (Table 3, Scenario 8). In a 10-fold larger room (3000m<sup>3</sup>), the mean risk of illness of one  
183 person was approximately four fold lower (24%; Table 3, Scenario 18). Event room sizes ranged from  
184 320-3000m<sup>3</sup>. Halving the exposure time (60 minutes), reduced the mean risk of illness by one-third  
185 (58%; Table 3, Scenario 5). Singing events ranged from 60-150 minutes with singing duration from  
186 20-120 minutes. Also increasing the ventilation to six ACH (9L/sec/person) reduced the dose and risk  
187 by approximately one-third (54%; Table 3, Scenario 9). Exact ACH for each event was not known.  
188 Based on received information on ventilation measures, events 1 and 5 could have had three ACH or  
189 more. For other events, one ACH or less is more likely. The mean risk of illness in case of  
190 supershedder presence was 94% with no ACH, exposure time of 120 minutes, in a small room (Table  
191 3, Scenario 7) compared to 0.48% with no supershedder present (Table 3, Scenario 10). In the  
192 AirCoV2 model, the mean probability of illness fell within the range or was higher than the observed  
193 attack rates for singing events described in this outbreak investigation in scenarios with at least 60  
194 minutes of singing in a small room, and in scenarios with 120 minutes of singing in a large room with  
195 no or little ventilation, with supershedder presence. Overall, the model indicated that high virus  
196 concentrations, i.e. supershedder presence, are required to explain high attack rates via this  
197 transmission route.

198

199



## 200 Discussion

201 Events had high attack rates (53-74%) demonstrating the high risk in these settings. Based on  
202 available epidemiological information, it is likely that SARS-CoV-2 transmission for most singing group  
203 members occurred at the singing events itself except those living together. In these five events, cases  
204 had little to no contact outside of events except for those who lived and travelled together to the  
205 event. At least six persons lived together and all six were confirmed cases. In all events, at least one  
206 singing group member reported their symptom onset between 0–3 days following the event (Figure  
207 1). These singing group members were potentially contagious during the events and this corresponds  
208 with known SARS-CoV-2 transmission dynamics with higher levels of shedding just prior to  
209 development of symptoms [15, 16]. A possible index case could be identified in four out of five  
210 clusters according to available information.

211 SARS-CoV-2 transmission routes include droplet and indirect contact transmission [10, 17]. Dutch  
212 national advice for singing groups as well as in other countries is directed at preventing these  
213 transmission routes [7, 18]. In general, the five singing groups tried to adhere to this advice. From  
214 available information, droplet transmission through prolonged social contact (within 1.5m) during  
215 the event itself seemed unlikely. Air currents from person to person because of open windows and  
216 doors or mechanical ventilation may have increased SARS-CoV-2 droplet transmission during these  
217 events, as droplets could have moved over longer distances (>1.5m) [19]. It remains possible that  
218 even if there is adequate ventilation but air currents are present, the increased dispersion of droplets  
219 produced by singing may be sufficient to increase droplet transmission. Although there is insufficient  
220 evidence regarding air currents, this possibility cannot be ruled out. ECDC guidelines recommend  
221 that direct airflow should be diverted away from groups of individuals to avoid pathogen dispersion  
222 from infected subjects and transmission [20] and Dutch national guidelines recommend airing out  
223 indoor spaces (eg. leaving doors/windows opposite each other wide open for 10-15 minutes) to  
224 create a draft during breaks [21].

225 Previous studies have shown SARS-CoV-2 transmission risk through indirect contact transmission to  
226 be low [22, 23]. Limited shared surfaces were present and only several singing group members  
227 reported touching common surfaces, therefore there is a low likelihood that this transmission route  
228 contributed to the high attack rates observed.

229 Singing expels approximately 10–15 times as much aerosols as speaking [13]. Additionally, singing  
230 increases aerosol dispersion compared to speaking and the amount of aerosols expelled increases  
231 with voice loudness [13, 24-27]. ACH was not obtained and event descriptions did not provide  
232 enough information to determine its role. Event rooms were generally large in size. If the air was not  
233 fully mixed, it may have been possible that air in the exhaled plume of the infectious person would  
234 have higher viral concentrations than the air in the far corner of the room, and thus gave rise to  
235 higher exposure closer to the infectious person. Airborne transmission is a possible route of  
236 transmission and has been described previously in a similar context [28]. In all events, cases were  
237 dispersed throughout the room which may be consistent with airborne transmission. According to  
238 the AirCov2 model, supershedder presence in the room is needed to achieve relevant risks of illness  
239 by aerosol transmission [19, 29-31].

240 From September to October 2020, 1.4% persons were infected in the Dutch population. Given that  
241 2.7% of infected persons may have been a possible supershedder ( $10^{10}$  virus mL in mucus) [13], then  
242 an estimated 95 supershedders of 3528 contagious persons may have been present among 252,000  
243 singing group members (~15 singers in each singing group) from September to October 2020.

244 Therefore, supershedder presence among the five events is theoretically possible, however we  
245 cannot confirm supershedder presence since CT-values were not available for confirmed cases.  
246 Additionally, multiple source cases may have been present in at least two events which could have  
247 contributed to the high attack rates.

248 Our study has several limitations. Due to the observational nature of this study, it was difficult to  
249 reconstruct exact circumstances of the clusters and proportions attributable to each possible  
250 transmission route could not be deduced. Secondly, there was a low number of specimens for

251 phylogenetic analysis due to limited specimen storage time (usually one week) during the  
252 investigation period. Also, a large number of laboratories were involved coupled with high work load  
253 for the public health services. Furthermore, asymptomatic cases may have been missed as not all  
254 persons were tested. Therefore, the number of possible source cases present at the events could not  
255 be identified in order to confirm whether singing group members were infected by a common  
256 source. Additionally, exact circumstances regarding airflow direction for each event were not known,  
257 and could not be accounted for in the model. Airflow was also dependent on weather for events  
258 using natural ventilation. Lastly, due to the retrospective nature of the questionnaires, recall bias  
259 could have affected the participants' responses indicating the likeliness of different transmission  
260 routes. However, almost all members described similar circumstances under which events occurred.

## 261 **Conclusions**

262 These outbreaks with high attack rates demonstrate the potential for SARS-CoV-2 transmission linked  
263 to singing events. In conclusion, our findings suggest that the described outbreaks were probably  
264 caused by a combination of different transmission routes as none of the possible transmission routes  
265 could be ruled out. Indirect contact and droplet transmission (<1.5m) may have occurred and may  
266 have been the cause of some cases, but it is unlikely to explain the high attack rates. The described  
267 AirCoV2 model indicated that airborne transmission (via infectious droplets/ aerosols over longer  
268 distances) was possible if a supershedder was present. Additionally, multiple index cases may have  
269 been present. However, the airflow as reported may also have expelled respiratory droplets over  
270 longer distances and previous studies have shown that directional airflow may possibly influence  
271 transmission [12, 32].

272 Further research is needed into the role of airflow and SARS-CoV-2 transmission dynamics in singing  
273 groups. Additionally, increased phylogenetic analysis should be performed to identify potential  
274 source cases to better assess clusters. Serology could also be performed to identify susceptible cases.  
275 In the clusters described here, it is possible that singing itself increased SARS-CoV-2 transmission risk  
276 through airborne transmission. As COVID-19 measures are eased and group gatherings are allowed,

277 specific recommendations regarding group singing may be needed, although with increasing  
278 vaccination coverage these may be loosened again.

279

280

281

282

283

284

285

286

287

288

289

290

291

292

293

294

295

296

297

298

299

300 **Table 1. Characteristics for each singing event and their respective venues from**  
 301 **September–October 2020.**

|                                                                | <b>Singing event 1</b> | <b>Singing event 2</b>           | <b>Singing event 3</b> | <b>Singing event 4</b>          | <b>Singing event 5</b> |
|----------------------------------------------------------------|------------------------|----------------------------------|------------------------|---------------------------------|------------------------|
| <b>Characteristics of singing group members</b>                |                        |                                  |                        |                                 |                        |
| Singing group members                                          | 19                     | 21                               | 15                     | 14                              | 9                      |
| Case definitions                                               |                        |                                  |                        |                                 |                        |
| Confirmed                                                      | 14                     | 13                               | 8                      | 7                               | 6                      |
| Probable                                                       | 0                      | 1                                | 0                      | 1                               | 0                      |
| Attack rate**                                                  | 74%<br>(14/19)*        | 67%<br>(14/21)                   | 53%<br>(8/15)          | 57%<br>(8/14)                   | 67%<br>(6/9)*          |
| Questionnaire response rate                                    | 58%<br>(11/19)         | 95%<br>(20/21)                   | 73%<br>(11/15)         | 100%<br>(14/14)                 | 78%<br>(7/9)           |
| Sex                                                            |                        |                                  |                        |                                 |                        |
| Female                                                         | 11*                    | 12                               | 7                      | 8                               | 6*                     |
| Male                                                           | 6*                     | 8                                | 4                      | 6                               | 1*                     |
| Median age (range)                                             | 74<br>(60-89)*         | 62.5<br>(54-74)                  | 51<br>(32-70)          | 57.5<br>(32-74)                 | 41<br>(20-55)*         |
| Specimens sequenced                                            | 0                      | 0                                | 0                      | 2                               | 5                      |
| Previously tested for SARS-CoV-2 since January 2020            |                        |                                  |                        |                                 |                        |
| Positive                                                       | 0                      | 0                                | 0                      | 0                               | 0                      |
| Negative                                                       | 0                      | 2                                | 3                      | 3                               | 1                      |
| Not tested                                                     | 10                     | 18                               | 8                      | 11                              | 6                      |
| Missing                                                        | 1                      | 0                                | 0                      | 0                               | 0                      |
| <b>Characteristics of venue where singing event took place</b> |                        |                                  |                        |                                 |                        |
| Venue type                                                     | Hall                   | Hall                             | Hall                   | Hall                            | Church                 |
| Size of venue (l x w x h)m <sup>3</sup>                        | 510<br>(14x14x2.6)     | 80m <sup>2</sup><br>(+ ~8m roof) | 561<br>(11x8.5x6)      | ~320                            | 3000<br>(20x15x10)     |
| Duration of event (mins)                                       | 90                     | 120                              | 150                    | 120                             | 60                     |
| Duration of singing (mins)                                     | 50                     | ~80                              | 120                    | ~90                             | 20                     |
| Duration of break (mins)                                       | 15                     | 5                                | 15                     | 15                              | NA                     |
| Natural ventilation                                            |                        |                                  |                        |                                 |                        |
| Number of doors open                                           |                        |                                  |                        |                                 |                        |
| Facing inside                                                  | 1                      | 2                                | 1                      | 2                               | 2                      |
| Facing outside                                                 | 1                      | 1                                | 0                      | 0                               | 0                      |
| Number of windows open                                         | 0                      | 2                                | 2                      | 6                               | 1                      |
| Additional ventilation                                         | None                   | None                             | Ceiling ventilation    | Possible mechanical ventilation | None                   |
| Other mechanism                                                | Heat exchanger         | None                             | None                   | None                            | Air heating            |

302 \*Data reported here is combined from the National Notifiable Surveillance Disease System and  
 303 questionnaire responses.

304 \*\*Attack rate includes confirmed and probable cases.

305 **Table 2. Potential exposures within and outside of the singing events for confirmed and**  
 306 **probable COVID-19 cases among singing groups from September–October 2020.**

|                                                                                                   |     | Singing event 1<br>(n = 8) | Singing event 2<br>(n = 14) | Singing event 3<br>(n = 8) | Singing event 4<br>(n = 8) | Singing event 5<br>(n = 6) |
|---------------------------------------------------------------------------------------------------|-----|----------------------------|-----------------------------|----------------------------|----------------------------|----------------------------|
| Kept 1.5m distance during the rehearsal/ performance                                              | Yes | 8                          | 14                          | 7                          | 8                          | 6                          |
|                                                                                                   | No  | 0                          | 0                           | 1                          | 0                          | 0                          |
| Kept 1.5m distance during the break                                                               | Yes | ?                          | ?                           | 6                          | 8                          | NA                         |
|                                                                                                   | No  | ?                          | ?                           | 2                          | 0                          | NA                         |
| Had contact before/after the rehearsal/ performance                                               | Yes | 2                          | 2                           | 3                          | 2                          | 2                          |
|                                                                                                   | No  | 6                          | 12                          | 5                          | 6                          | 4                          |
| Kept 1.5m distance before/ after the singing event                                                | Yes | 2                          | 2                           | 0                          | 0                          | 2                          |
|                                                                                                   | No  | 0                          | 0                           | 3                          | 2                          | 0                          |
| Travelled together to/from the singing event                                                      | Yes | 3                          | 3                           | 2                          | 5                          | 0                          |
|                                                                                                   | No  | 5                          | 11                          | 6                          | 3                          | 6                          |
| Kept 1.5m distance during travel                                                                  | Yes | 0                          | 0                           | 0                          | 1                          | NA                         |
|                                                                                                   | No  | 3                          | 3                           | 1                          | 4                          | NA                         |
| Felt (cold) airflow during the singing event                                                      | Yes | 2*                         | ?*                          | 4                          | 2                          | 1                          |
|                                                                                                   | No  | ?*                         | ?*                          | 4                          | 6                          | 5                          |
| Toilet used during the break                                                                      | Yes | ?                          | ?                           | 6                          | 1                          | 4                          |
|                                                                                                   | No  | ?                          | ?                           | 2                          | 7                          | 2                          |
| Sang in another singing group 14 days prior to singing event                                      | Yes | 1                          | 1                           | 0                          | 0                          | 1                          |
|                                                                                                   | No  | 7                          | 13                          | 8                          | 8                          | 5                          |
| Had contact with person tested positive for SARS-CoV-2 in the 14 days prior to singing event      | Yes | 0                          | 0                           | 1                          | 0                          | 1                          |
|                                                                                                   | No  | 8                          | 14                          | 7                          | 8                          | 5                          |
| Had contact with person tested positive for SARS-CoV-2 in the 14 days following the singing event | Yes | 2                          | 1                           | 0                          | 0                          | 1                          |
|                                                                                                   | No  | 6                          | 13                          | 8                          | 8                          | 5                          |
| Had contact with person tested positive for SARS-CoV-2 (date not specified)                       | Yes | 1                          | 0                           | 1                          | 0                          | 0                          |

307 \* Information for these two singing groups was extracted from comments in the singing group  
 308 member questionnaire. Question investigating airflow was later added to the singing group member  
 309 questionnaire following spontaneous reporting.

310

311

312 **Table 3. Dose and illness risks from simulations with AirCoV2 version 1.5.**

|    | m <sup>3</sup> | Q | T   | C  | Cumulative dose (virus RNA copies)<br>/person |      |      |       | Illness risk/person/event |       |       |       |
|----|----------------|---|-----|----|-----------------------------------------------|------|------|-------|---------------------------|-------|-------|-------|
|    |                |   |     |    | Mean                                          | 5%   | 50%  | 95%   | Mean                      | 5%    | 50%   | 95%   |
| 1  | 300            | 0 | 30  | 10 | 540                                           | 140  | 430  | 1300  | 29%                       | 9.4%  | 26%   | 60%   |
| 2  | 300            | 1 | 30  | 10 | 470                                           | 120  | 370  | 1100  | 26%                       | 8.1%  | 23%   | 54%   |
| 3  | 300            | 6 | 30  | 10 | 250                                           | 66   | 200  | 620   | 16%                       | 4.5%  | 13%   | 35%   |
| 4  | 300            | 0 | 60  | 10 | 2000                                          | 530  | 1600 | 4800  | 66%                       | 31%   | 67%   | 97%   |
| 5  | 300            | 1 | 60  | 10 | 1500                                          | 390  | 1200 | 3700  | 58%                       | 24%   | 57%   | 92%   |
| 6  | 300            | 6 | 60  | 10 | 610                                           | 160  | 490  | 1500  | 32%                       | 11%   | 29%   | 64%   |
| 7  | 300            | 0 | 120 | 10 | 6900                                          | 1800 | 5500 | 17000 | 94%                       | 72%   | 98%   | 100%  |
| 8  | 300            | 1 | 120 | 10 | 4300                                          | 1100 | 3400 | 10000 | 86%                       | 54%   | 91%   | 100%  |
| 9  | 300            | 6 | 120 | 10 | 1300                                          | 350  | 1100 | 3200  | 54%                       | 22%   | 53%   | 90%   |
| 10 | 300            | 0 | 120 | 7  | 6.9                                           | 1    | 5    | 18    | 0.48%                     | 0.07% | 0.35% | 1.3%  |
| 11 | 3000           | 0 | 30  | 10 | 55                                            | 13   | 43   | 130   | 3.7%                      | 0.91% | 3%    | 8.9%  |
| 12 | 3000           | 1 | 30  | 10 | 47                                            | 11   | 37   | 110   | 3.2%                      | 0.77% | 2.6%  | 7.6%  |
| 13 | 3000           | 6 | 30  | 10 | 26                                            | 6    | 20   | 62    | 1.8%                      | 0.42% | 1.4%  | 4.2%  |
| 14 | 3000           | 0 | 60  | 10 | 200                                           | 52   | 160  | 490   | 13%                       | 3.6%  | 11%   | 29%   |
| 15 | 3000           | 1 | 60  | 10 | 150                                           | 38   | 120  | 370   | 9.9%                      | 2.6%  | 8.1%  | 23%   |
| 16 | 3000           | 6 | 60  | 10 | 62                                            | 15   | 49   | 150   | 4.2%                      | 1%    | 3.4%  | 10%   |
| 17 | 3000           | 0 | 120 | 10 | 700                                           | 180  | 560  | 1700  | 35%                       | 12%   | 32%   | 70%   |
| 18 | 3000           | 1 | 120 | 10 | 430                                           | 110  | 340  | 1000  | 24%                       | 7.5%  | 21%   | 52%   |
| 19 | 3000           | 6 | 120 | 10 | 130                                           | 34   | 110  | 330   | 8.8%                      | 2.4%  | 7.2%  | 20%   |
| 20 | 3000           | 0 | 120 | 7  | 0.7                                           | 0    | 0    | 3     | 0.049%                    | 0%    | 0%    | 0.21% |

313 m<sup>3</sup>: room size, small room 10x10x3=300m<sup>3</sup>, large room 20x25x6=3000 m<sup>3</sup>;

314 Q: air exchanges/hour; T: exposure time (minutes); C: virus RNA copies/mL, 10=10<sup>10</sup> and 7=10<sup>7</sup>.

315 Scenarios:

316 - Always one person as source, 15 persons exposed.

317 - Fraction of virus RNA copies infectious to cell culture: 0.0125 (1/80).

318 - Fraction of those viruses leading to illness: 0.056 (1/18).

319 - So, fraction of virus RNA copies leading to illness: 0.0007 (1/1440).

320 - Probability of at least 10<sup>7</sup> RNA copies/ml in mucus is 66%.

321 - Probability of at least 10<sup>8</sup> RNA copies/ml in mucus is 36%.

322 - Probability of at least 10<sup>9</sup> RNA copies/ml in mucus is 13%.

323 - Probability of at least 10<sup>10</sup> RNA copies/ml in mucus is 2.7%. Used to simulate a  
324 supershedder

325 Model AirCoV2 (version 1.5) parameters described by Schijven et al. [13]

326 **Figure 1. Confirmed and probable COVID-19 cases in each singing event, September–**  
 327 **October 2020 by date of symptom onset, or alternatively by date of positive test.**

328 \*Data is combined from the National Notifiable Surveillance Disease System and questionnaire  
 329 responses.

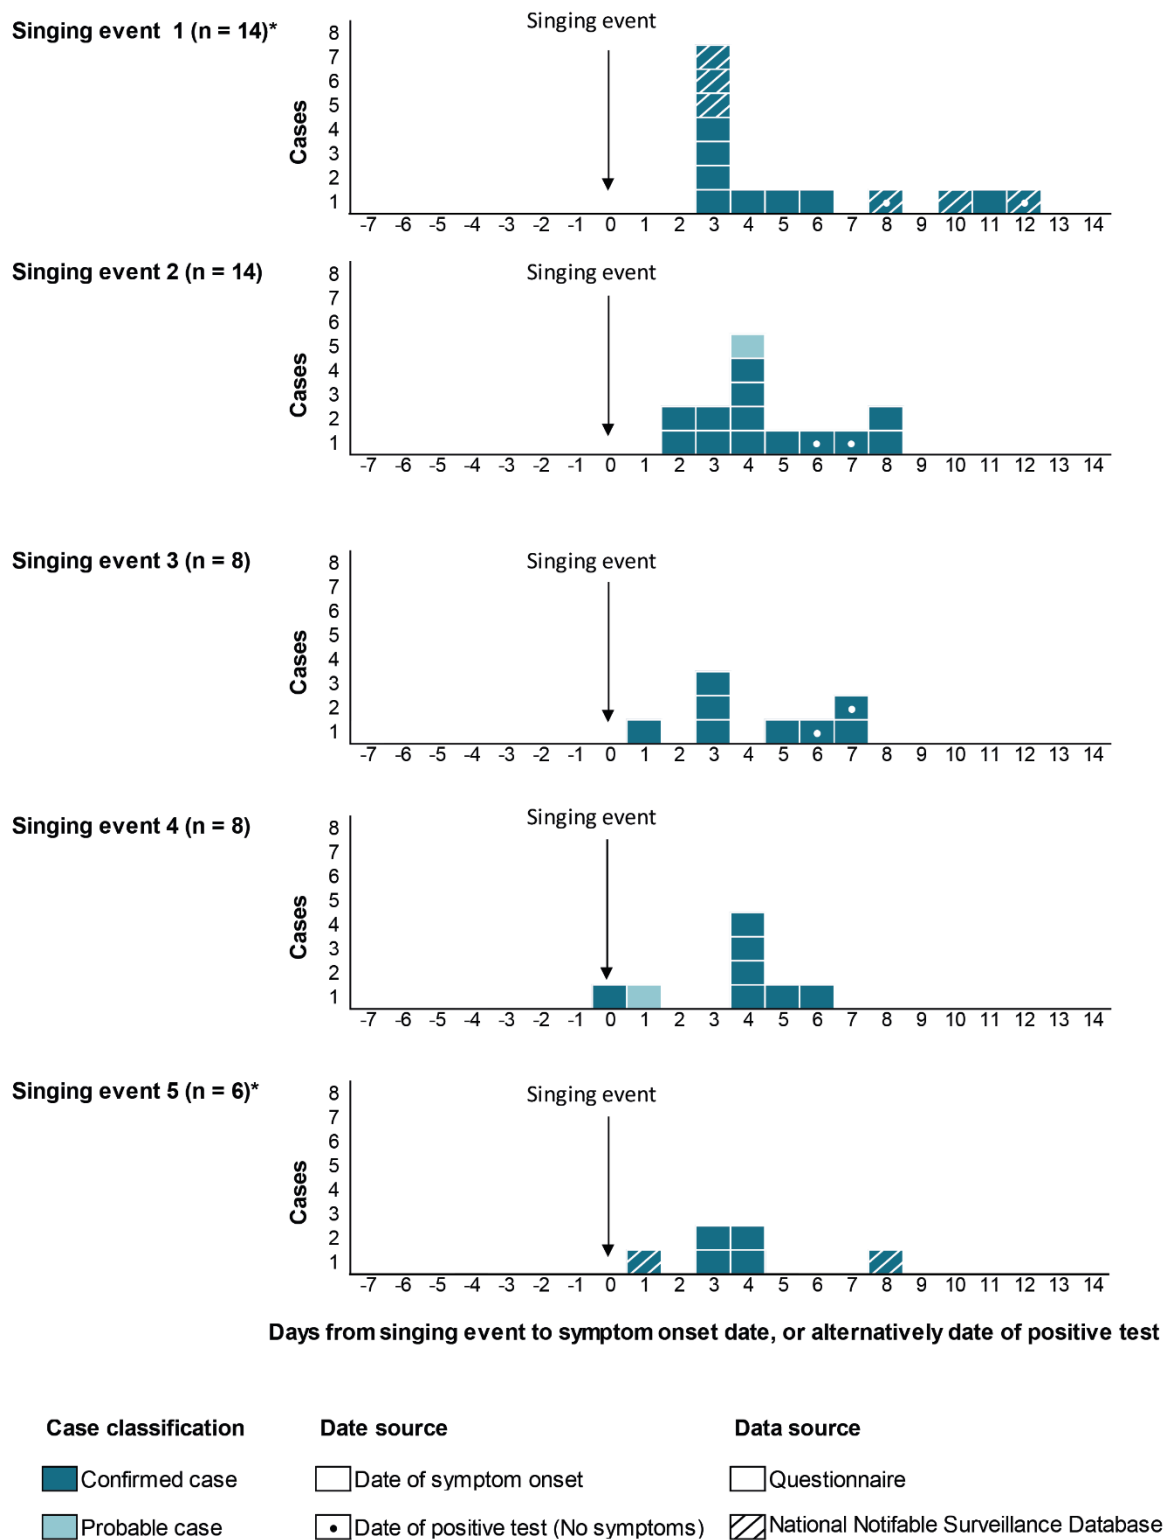

330



## 331 **Authors' contributions**

332 All authors contributed to the outbreak investigations described in this report. AS wrote the first  
333 draft of the manuscript and coordinated the revision of the manuscript. JS and LV contributed to the  
334 Aerosol transmission modelling outputs. All authors contributed to the interpretation of the data,  
335 critically revised the manuscript and approved the final version.

## 336 **Funding**

337 No external funding was received.

## 338 **Acknowledgements**

339 We are thankful to staff at Municipal Health Services, laboratories and clinicians for reporting and  
340 investigating COVID-19 cases. We gratefully acknowledge the affected choir focal points for their  
341 trustful sharing of information and this study was only possible thanks to the collaboration of  
342 affected individuals from the outbreaks. We thank Harry Vennema for carrying out phylogenetic  
343 analysis and Atze Boerstra for ventilation advice during this outbreak investigation.

## 344 **Conflict of interest**

345 None declared.

## 346 **Ethical statement**

347 The outbreak investigations were carried out in accordance with the Dutch Public Health Act.

348 Participation in the questionnaire was voluntary and online informed consent was obtained.

349

350

351

352

## 353 References

- 354 1. Hamner, L., et al., *High SARS-CoV-2 Attack Rate Following Exposure at a Choir Practice -*  
355 *Skagit County, Washington, March 2020*. MMWR Morb Mortal Wkly Rep, 2020. **69**(19): p.  
356 606-610.
- 357 2. Gelderland, O. *Koor Heerde verloor zes leden aan corona: 40 procent werd ziek*. 2020 20  
358 November 2020]; Available from: [https://www.omroep gelderland.nl/nieuws/2448308/Koor-](https://www.omroep gelderland.nl/nieuws/2448308/Koor-Heerde-verloor-zes-leden-aan-corona-40-procent-werd-ziek)  
359 [Heerde-verloor-zes-leden-aan-corona-40-procent-werd-ziek](https://www.omroep gelderland.nl/nieuws/2448308/Koor-Heerde-verloor-zes-leden-aan-corona-40-procent-werd-ziek).
- 360 3. Gelderlander, D. *Ook veel 'coronagevallen' bij vrouwenkoor Between Two rivers dat in Elst*  
361 *repeteerde*. 2020 20 November 2020]; Available from:  
362 [https://www.gelderlander.nl/overbetuwe/ook-veel-coronagevallen-bij-vrouwenkoor-](https://www.gelderlander.nl/overbetuwe/ook-veel-coronagevallen-bij-vrouwenkoor-between-two-rivers-dat-in-elst-repeteerde~ac080406/)  
363 [between-two-rivers-dat-in-elst-repeteerde~ac080406/](https://www.gelderlander.nl/overbetuwe/ook-veel-coronagevallen-bij-vrouwenkoor-between-two-rivers-dat-in-elst-repeteerde~ac080406/).
- 364 4. Oost, R. *Corona in Hasselt | Musicalkoor extra zwaar getroffen: dirigent ging door oog van de*  
365 *naald*. 2020 [cited 2020; Available from: [https://www.rtvoost.nl/nieuws/328138/Corona-in-](https://www.rtvoost.nl/nieuws/328138/Corona-in-Hasselt-Musicalkoor-extra-zwaar-getroffen-dirigent-ging-door-oog-van-de-naald)  
366 [Hasselt-Musicalkoor-extra-zwaar-getroffen-dirigent-ging-door-oog-van-de-naald](https://www.rtvoost.nl/nieuws/328138/Corona-in-Hasselt-Musicalkoor-extra-zwaar-getroffen-dirigent-ging-door-oog-van-de-naald).
- 367 5. Times, T. *Did singing together spread COVID-19?* 2020 20 November 2020]; Available from:  
368 <https://www.taipetimes.com/News/world/archives/2020/05/18/2003736628>.
- 369 6. Limburger, D. *Hoe een gouden jaar een zwart jaar werd: zangkoren recht in het hart*  
370 *getroffen door corona*. 2020 20 November 2020]; Available from:  
371 [https://www.limburger.nl/cnt/dmf20200517\\_00160696/ho-een-gouden-jaar-een-zwart-](https://www.limburger.nl/cnt/dmf20200517_00160696/ho-een-gouden-jaar-een-zwart-jaar-werd-voor-zangkoren-gronsveld-en-eijsden)  
372 [jaar-werd-voor-zangkoren-gronsveld-en-eijsden](https://www.limburger.nl/cnt/dmf20200517_00160696/ho-een-gouden-jaar-een-zwart-jaar-werd-voor-zangkoren-gronsveld-en-eijsden).
- 373 7. RIVM. *Koren en zangensembles*. 2020 1 July 2020 20 November 2020]; Available from:  
374 <https://lci.rivm.nl/koren-zangensembles>.
- 375 8. Association, E.C. *Singing Europe*. 2015 20 November 2020]; Available from:  
376 [https://europeanchoralassociation.org/wp-](https://europeanchoralassociation.org/wp-content/uploads/2019/01/singingeurope_report.pdf)  
377 [content/uploads/2019/01/singingeurope\\_report.pdf](https://europeanchoralassociation.org/wp-content/uploads/2019/01/singingeurope_report.pdf).

- 378 9. RIVM. *Wekelijkse update epidemiologische situatie COVID-19 in Nederland*. 2020 20  
379 November 2020]; Available from: [https://www.rivm.nl/coronavirus-covid-](https://www.rivm.nl/coronavirus-covid-19/actueel/wekelijkse-update-epidemiologische-situatie-covid-19-in-nederland)  
380 [19/actueel/wekelijkse-update-epidemiologische-situatie-covid-19-in-nederland](https://www.rivm.nl/coronavirus-covid-19/actueel/wekelijkse-update-epidemiologische-situatie-covid-19-in-nederland).
- 381 10. CDC. *Scientific Brief: SARS-CoV-2 and Potential Airborne Transmission*. 2020 5 October 2020  
382 [cited 2021 25 January]; Available from: [https://www.cdc.gov/coronavirus/2019-](https://www.cdc.gov/coronavirus/2019-ncov/more/scientific-brief-sars-cov-2.html)  
383 [ncov/more/scientific-brief-sars-cov-2.html](https://www.cdc.gov/coronavirus/2019-ncov/more/scientific-brief-sars-cov-2.html).
- 384 11. Bourouiba, L., *Turbulent Gas Clouds and Respiratory Pathogen Emissions: Potential*  
385 *Implications for Reducing Transmission of COVID-19*. *Jama*, 2020. **323**(18): p. 1837-1838.
- 386 12. Kwon, K.S., et al., *Evidence of Long-Distance Droplet Transmission of SARS-CoV-2 by Direct Air*  
387 *Flow in a Restaurant in Korea*. *J Korean Med Sci*, 2020. **35**(46): p. e415.
- 388 13. Schijven, J.F., et al., *Quantitative risk assessment for airborne transmission of SARS-CoV-2 via*  
389 *breathing, speaking, singing, coughing and sneezing Environmental Health Perspectives,*  
390 *submitted*. medRxiv, 2020: p. 2020.07.02.20144832.
- 391 14. Kleiboeker, S., et al., *SARS-CoV-2 viral load assessment in respiratory samples*. *J Clin Virol*,  
392 2020. **129**: p. 104439.
- 393 15. McAloon, C., et al., *Incubation period of COVID-19: a rapid systematic review and meta-*  
394 *analysis of observational research*. *BMJ Open*, 2020. **10**(8): p. e039652.
- 395 16. Xie, Y., et al., *Epidemiologic, clinical, and laboratory findings of the COVID-19 in the current*  
396 *pandemic: systematic review and meta-analysis*. *BMC Infectious Diseases*, 2020. **20**(1): p.  
397 640.
- 398 17. WHO. *Transmission of SARS-CoV-2: implications for infection prevention precautions*. 2020  
399 [cited 2021 17 February]; Available from: [https://www.who.int/news-](https://www.who.int/news-room/commentaries/detail/transmission-of-sars-cov-2-implications-for-infection-prevention-precautions)  
400 [room/commentaries/detail/transmission-of-sars-cov-2-implications-for-infection-prevention-](https://www.who.int/news-room/commentaries/detail/transmission-of-sars-cov-2-implications-for-infection-prevention-precautions)  
401 [precautions](https://www.who.int/news-room/commentaries/detail/transmission-of-sars-cov-2-implications-for-infection-prevention-precautions).
- 402 18. England, P.H. *COVID-19: suggested principles of safer singing*. 2020 [cited 2021 17 February];  
403 Available from: [https://www.gov.uk/government/publications/covid-19-suggested-](https://www.gov.uk/government/publications/covid-19-suggested-principles-of-safer-singing/covid-19-suggested-principles-of-safer-singing)  
404 [principles-of-safer-singing/covid-19-suggested-principles-of-safer-singing](https://www.gov.uk/government/publications/covid-19-suggested-principles-of-safer-singing/covid-19-suggested-principles-of-safer-singing).

- 405 19. Bahl, P., et al., *Droplets and Aerosols Generated by Singing and the Risk of Coronavirus*  
406 *Disease 2019 for Choirs*. Clinical Infectious Diseases, 2020.
- 407 20. ECDC. *Heating, ventilation and air-conditioning systems in the context of COVID-19: first*  
408 *update*. 2020 [20 November 2020]; Available from:  
409 [https://www.ecdc.europa.eu/en/publications-data/heating-ventilation-air-conditioning-](https://www.ecdc.europa.eu/en/publications-data/heating-ventilation-air-conditioning-systems-covid-19)  
410 [systems-covid-19](https://www.ecdc.europa.eu/en/publications-data/heating-ventilation-air-conditioning-systems-covid-19).
- 411 21. RIVM. *Ventilatie en COVID-19*. 2020 [20 November 2020]; Available from:  
412 <https://lci.rivm.nl/ventilatie-en-covid-19>.
- 413 22. Pitol, A.K. and T.R. Julian, *Community Transmission of SARS-CoV-2 by Surfaces: Risks and Risk*  
414 *Reduction Strategies*. Environmental Science & Technology Letters, 2021. **8**(3): p. 263-269.
- 415 23. CDC. *Science Brief: SARS-CoV-2 and Surface (Fomite) Transmission for Indoor Community*  
416 *Environments*. 2021 [cited 2021 10 June]; Available from:  
417 [https://www.cdc.gov/coronavirus/2019-ncov/more/science-and-research/surface-](https://www.cdc.gov/coronavirus/2019-ncov/more/science-and-research/surface-transmission.html#ref8)  
418 [transmission.html#ref8](https://www.cdc.gov/coronavirus/2019-ncov/more/science-and-research/surface-transmission.html#ref8).
- 419 24. Echternach, M., et al., *Impulse Dispersion of Aerosols During Singing and Speaking: A*  
420 *Potential COVID-19 Transmission Pathway*. Am J Respir Crit Care Med, 2020.
- 421 25. Asadi, S., et al., *Aerosol emission and superemission during human speech increase with voice*  
422 *loudness*. Sci Rep, 2019. **9**(1): p. 2348.
- 423 26. Gregson, et al., *Comparing the Respirable Aerosol Concentrations and Particle Size*  
424 *Distributions Generated by Singing, Speaking and Breathing*. 2020.
- 425 27. Mürbe D, K.M., Lange J, Rotheudt H, Fleischer M. , *Aerosol emission is increased in*  
426 *professional singing*. OSF Preprints, 2020.
- 427 28. Katelaris, A.L., et al., *Epidemiologic Evidence for Airborne Transmission of SARS-CoV-2 during*  
428 *Church Singing, Australia, 2020*. Emerg Infect Dis, 2021. **27**(6): p. 1677-1680.
- 429 29. Buonanno, G., L. Morawska, and L. Stabile, *Quantitative assessment of the risk of airborne*  
430 *transmission of SARS-CoV-2 infection: prospective and retrospective applications*. medRxiv,  
431 2020: p. 2020.06.01.20118984.

- 432 30. Chen, P.Z., et al., *Heterogeneity in transmissibility and shedding SARS-CoV-2 via droplets and*  
433 *aerosols*. medRxiv, 2020: p. 2020.10.13.20212233.
- 434 31. Miller, S.L., et al., *Transmission of SARS-CoV-2 by inhalation of respiratory aerosol in the*  
435 *Skagit Valley Chorale superspreading event*. Indoor Air, 2020.
- 436 32. Lu, J., et al., *COVID-19 Outbreak Associated with Air Conditioning in Restaurant, Guangzhou,*  
437 *China, 2020*. Emerg Infect Dis, 2020. **26**(7): p. 1628-1631.
- 438
